# Supplementary material for: Metagenomic and single-cell RNA-Seq survey of the Helicobacter pylori–infected stomach in asymptomatic individuals
Source: JCI journal article supplement (doi:10.1172/jci.insight.161042), 2023-02-21
Supplement: sd1 [file 1]

1 SUPPLEMENTAL MATERIAL

2

3 Metagenomic and single-cell RNA-seq survey of the *H. pylori*-  
4 infected stomach in asymptomatic individuals

5

6 **Short Title:** Microbiome and immunology survey of stomach

7

8 Chiara Sorini<sup>1,2,\*</sup>, Kumar P. Tripathi<sup>1,2,\*</sup>, Shengru Wu<sup>3,\*</sup>, Shawn M. Higdon<sup>3</sup>, Jing Wang<sup>3</sup>, Liqin  
9 Cheng<sup>3</sup>, Sanghita Banerjee<sup>1,2</sup>, Annika Reinhardt<sup>1</sup>, Taras Kreslavsky<sup>1</sup>, Anders Thorell<sup>4</sup>, Lars  
10 Engstrand<sup>3</sup>, Juan Du<sup>3,§,#</sup> and Eduardo J. Villablanca<sup>1,2,§,&,#</sup>

11

12 <sup>1</sup> Division of Immunology and Allergy, Department of Medicine Solna, Karolinska Institutet  
13 and University Hospital, Stockholm, Sweden

14 <sup>2</sup> Center of Molecular Medicine, Stockholm, Sweden

15 <sup>3</sup> Department of Microbiology, Tumor and Cell Biology, Centre for Translational Microbiome  
16 Research (CTMR), Karolinska Institutet, Stockholm, Sweden

17 <sup>4</sup> Ersta Hospital, Stockholm, Sweden

18

19 \* and § These authors contributed equally to this work

20

21 #Correspondence: J.D. ([juan.du@ki.se](mailto:juan.du@ki.se)) and E.J.V. ([eduardo.villablanca@ki.se](mailto:eduardo.villablanca@ki.se))

22 & Lead contact E.J.V. ([eduardo.villablanca@ki.se](mailto:eduardo.villablanca@ki.se))

23

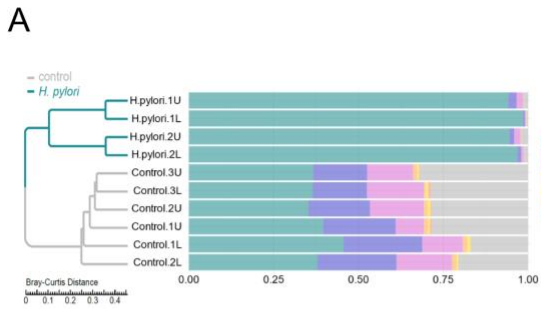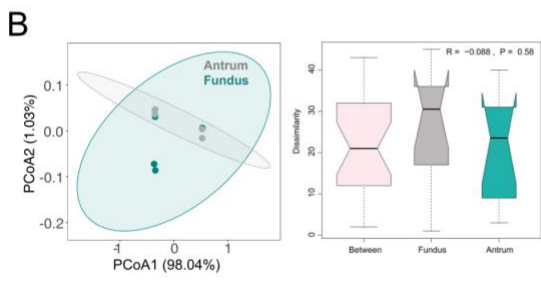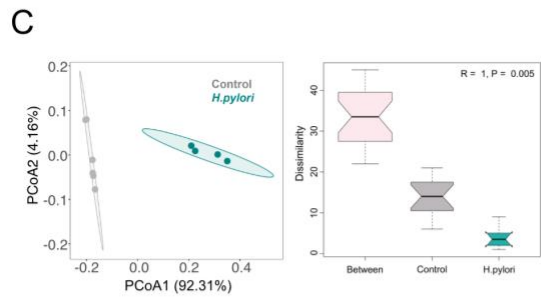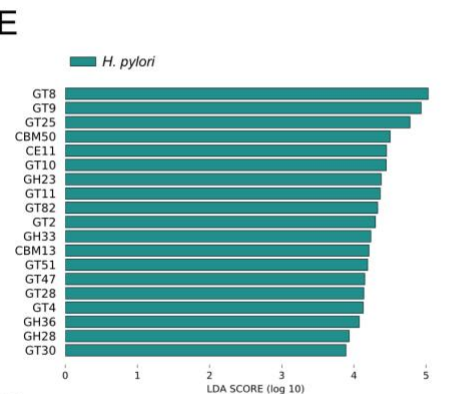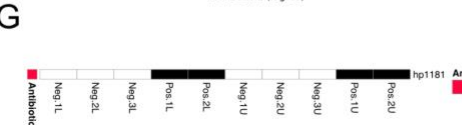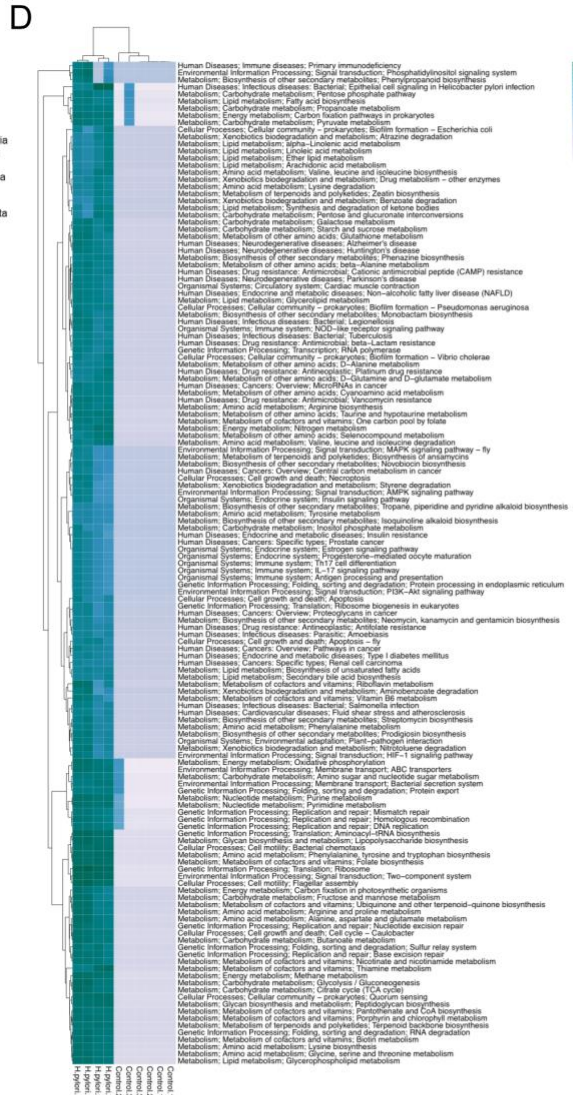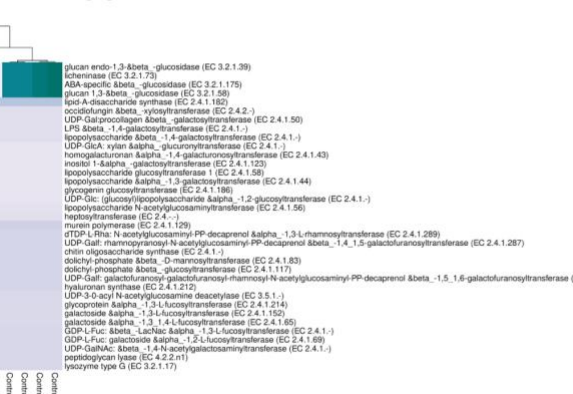

26 **Suppl. Figure 1 | Composition and function of the gastric microbiome are altered in *H.***  
27 ***pylori*-infected tissues.**

28 **a.** The ten most abundant bacteria at the Phylum level and sample clustering of the HPI and  
29 uninfected tissues based on Bray-Curtis distance. **b.** The PCoA plot of fundus and antrum  
30 samples with identified bacterial species based on Bray-Curtis distance. The analysis of  
31 similarities (Anosim) showing no difference in the microbial diversity between the fundus and  
32 antrum regions. **c.** The PCoA plot based on functional abundance in KEGG database. The  
33 analysis of similarities (Anosim) showed a significant difference in the functional abundance  
34 of the HPI and uninfected tissues. **d.** Heatmap highlighting the significantly altered microbial  
35 functional pathways in KEGG database between HPI and uninfected tissues. The differential  
36 metagenome functions were obtained using Metastats analysis with  $q$  value  $< 0.05$ . **e.**  
37 Significantly changed microbial carbohydrate-active enzymes families from the gastric  
38 microbiome of the HPI tissues using linear discriminant analysis (LDA) effect size (LEfSe)  
39 analysis (LDA $>3$ ). **f.** Significantly changed enzymes observed from the gastric microbiome of  
40 the HPI tissues compared to uninfected tissues from KEGG enzyme database. The  
41 differential metagenome enzymes were obtained using Metastats analysis with  $q$  value  $<$   
42  $0.05$ . **g.** Only resistance gene hp1181, expressed in the *H. pylori*-infected tissues, was  
43 identified based on the comprehensive antibiotic research database (CARD). The differential  
44 metagenome gene was obtained using Metastats analysis with  $q$  value  $< 0.05$ .

45

A

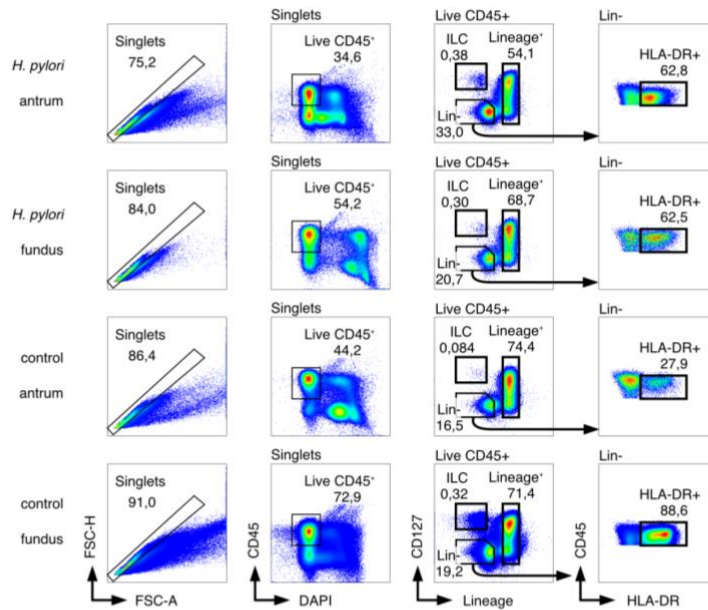

B

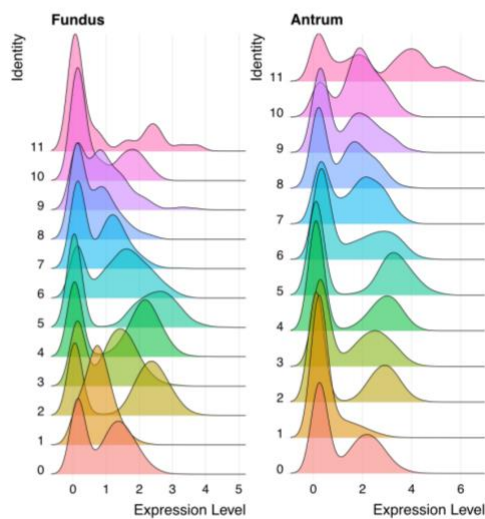

C

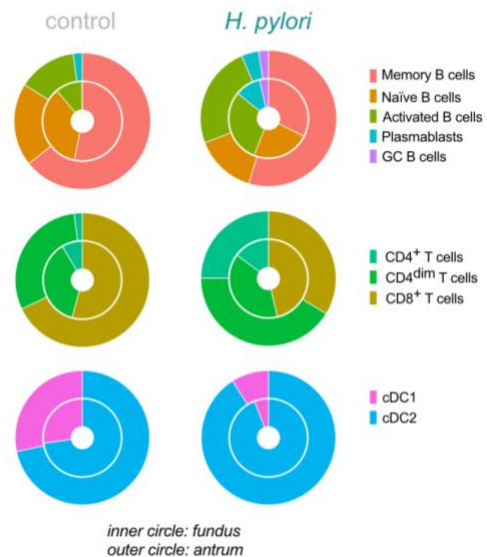

46

47

48 **Suppl. Figure 2 | Sorting and clustering of immune cells from the stomach of HPI and**  
 49 **uninfected tissues.**

50 **a.** Gating strategy for the sorting of selected immune cells from the stomach of HPI and  
 51 uninfected tissues. **b.** Histograms showing expression of fundus- and antrum-associated  
 52 hashtags within each cluster identified in Figure 2b. **c.** Pie charts comparing percentages of  
 53 clustered immune cells from Fig. 2B in antrum and fundus, within the three major groups of  
 54 co-enriched cells: B cells, T cells and myeloid cells.

55

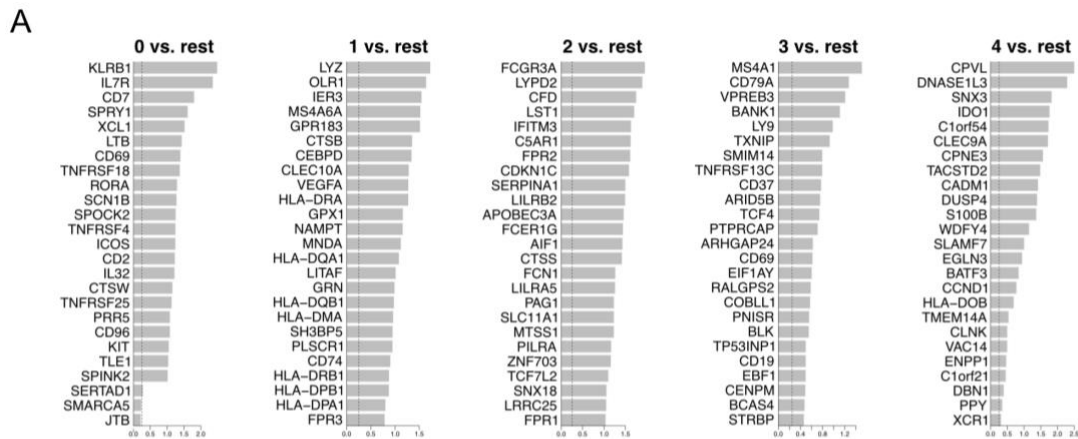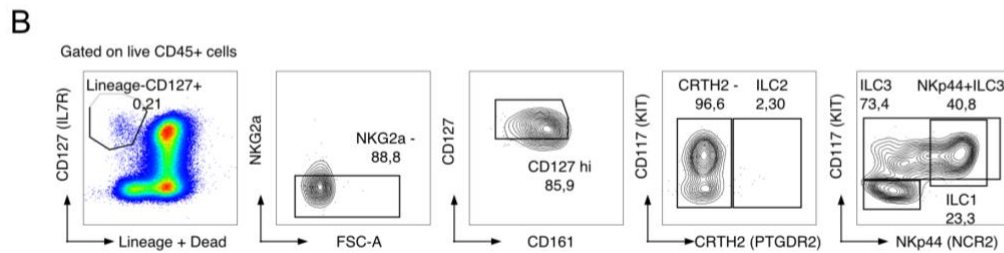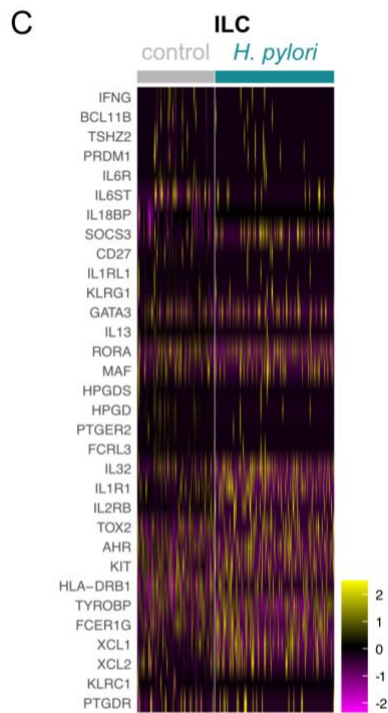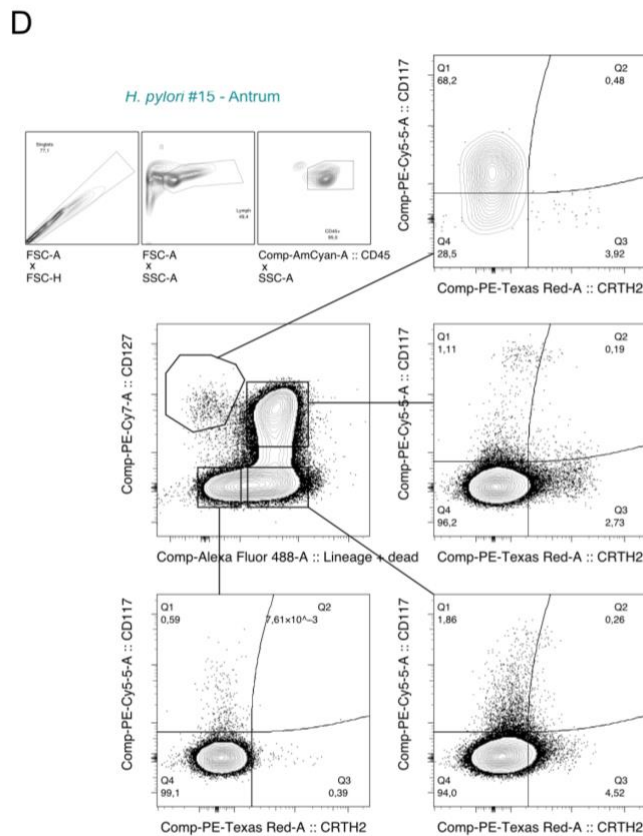

56

57 **Suppl. Figure 3 | Innate immune cells from the HPI and uninfected tissues.**

58 **a.** Top differentially expressed genes in clusters shown in Figure 3a. **b.** Complete gating

59 strategy used for the identification of ILC subsets in the gastric lamina propria. **c.**

60 Transcriptomic insight of cells annotated as ILC in Figure 5a. **d.** Example of CD117 and

61 CRTH2 protein expression in CD45+ cells other than Lineage-CD127+ ILCs.

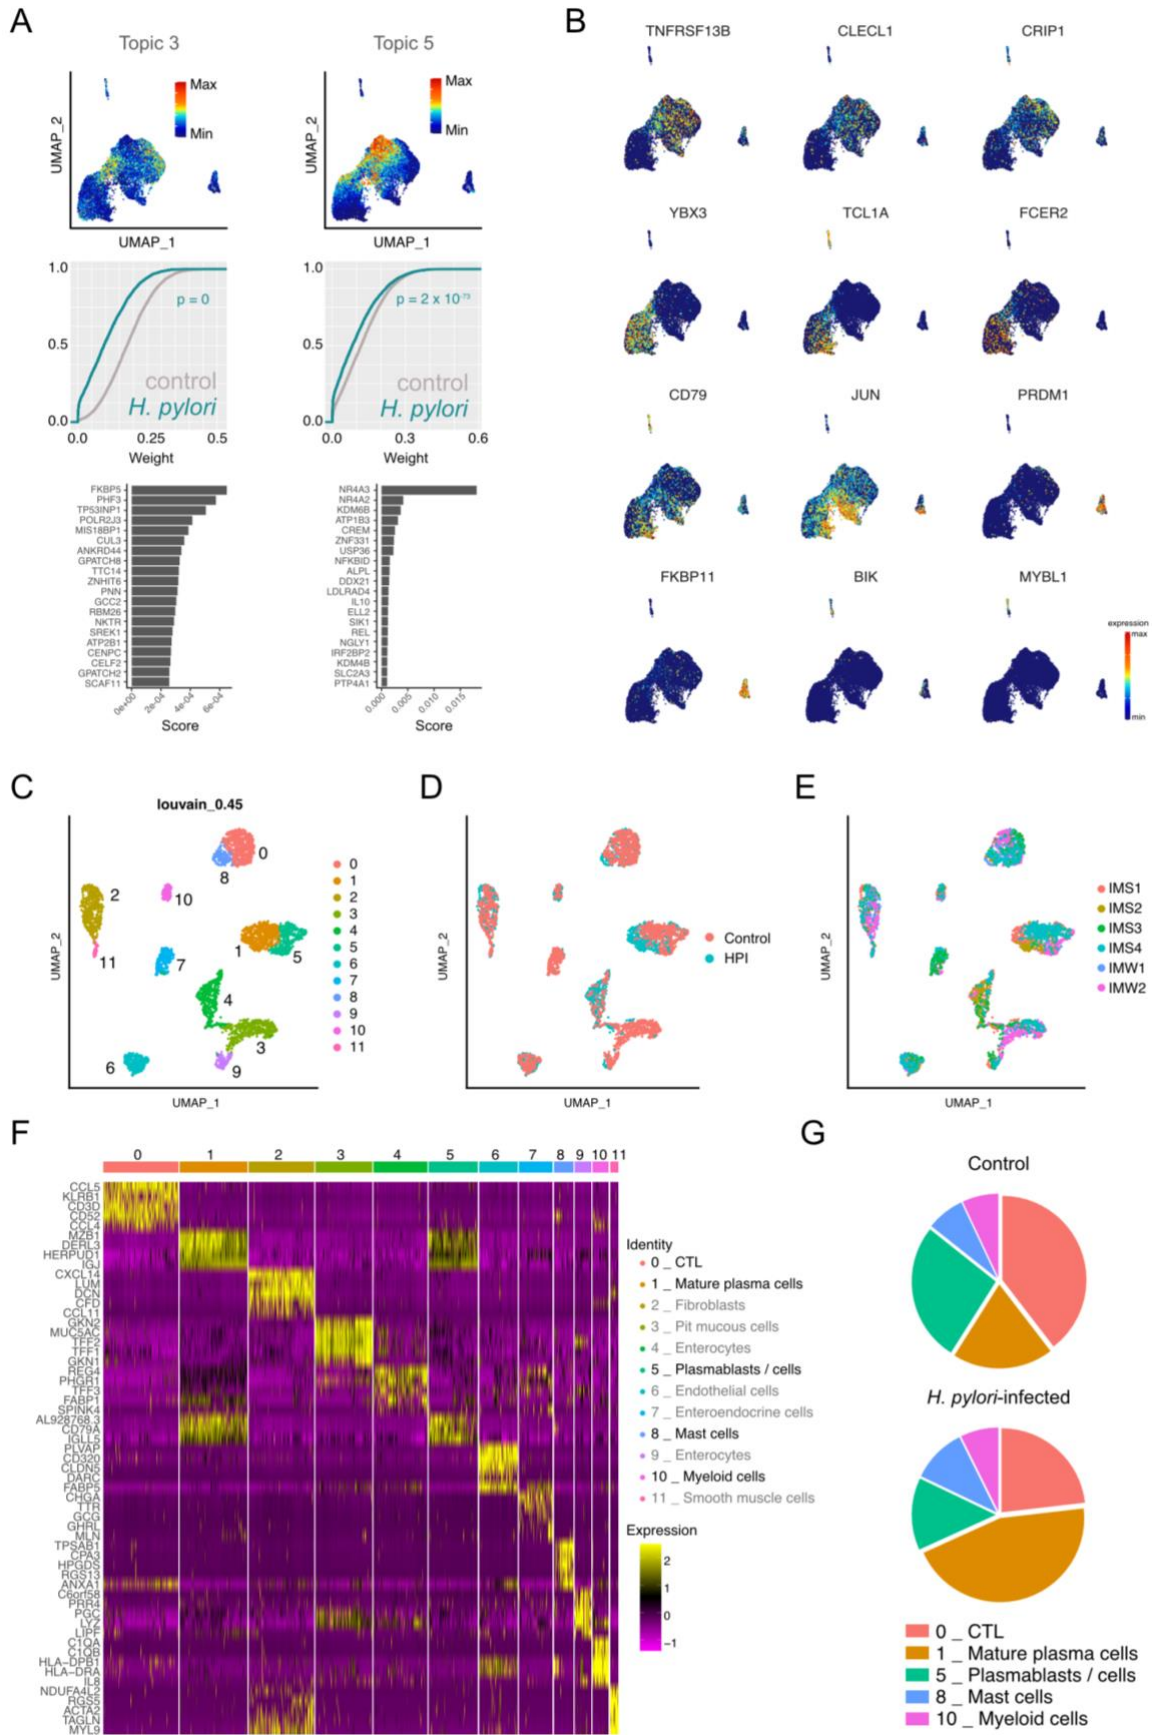

63 **Suppl. Figure 4 | Additional B cell topic analysis in the HPI and uninfected tissues.**  
64 **a.** B cell topics left out from analysis in Figure 4d. **b.** Weight of selected genes that define B  
65 cell topics. **c-e.** UMAP visualization of gastric cells from intestinal metaplasia patients  
66 sequenced by Zhang *et al.*, *Cell Rep* (2019) (GSE134520) (40), color-coded based on  
67 unbiased clustering (c), *H. pylori* status (d), and their sample origin in the published paper  
68 (e). **f.** Heatmap of the clustered GSE134520 dataset. **g.** Percentages of immune cells  
69 detected in the clustered GSE134520 dataset.  
70

A

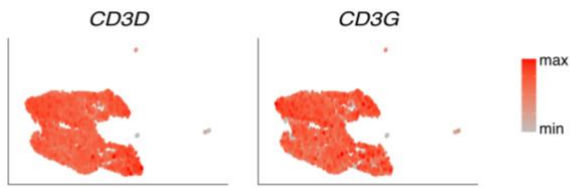

B

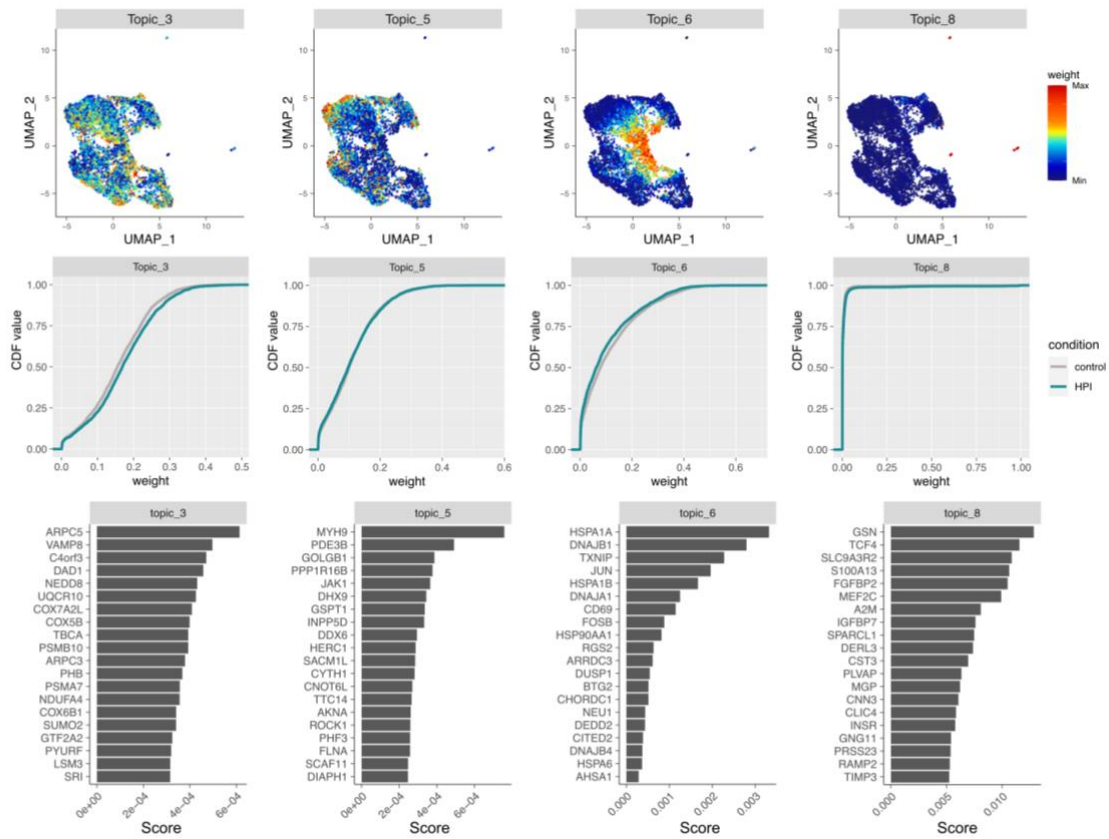

71

72

73 **Suppl. Figure 5 | Additional T cell subset and topic analysis in the HPI and uninfected**  
 74 **tissues.**

75 **a.** UMAP plots showing expression of *CD3D* and *CD3G* in T cells. **b.** T cell topics left out  
 76 from analysis in Figure 5d.

77

78



A

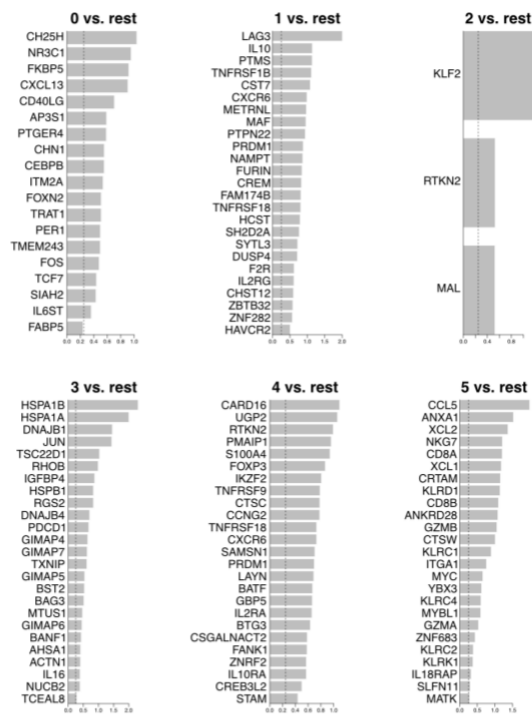

B

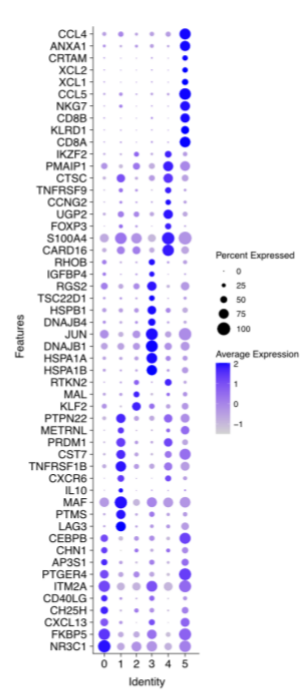

C

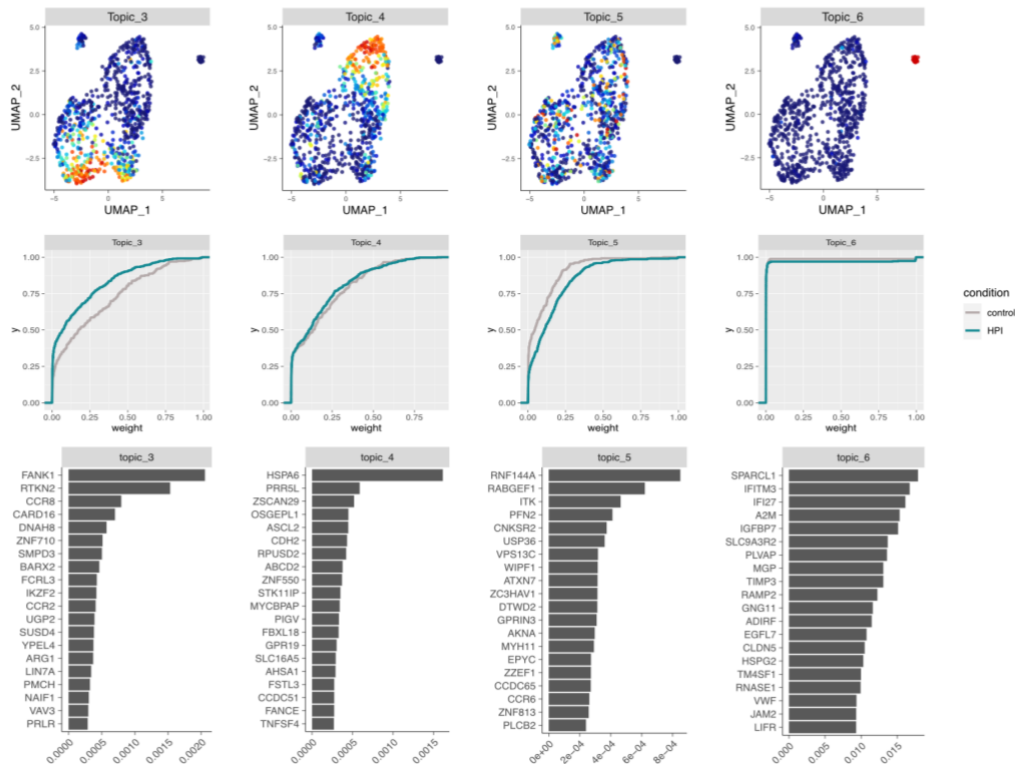

79

80 **Suppl. Figure 6 | Characterization of activated CD4<sup>+</sup> T cell subsets in the HPI and**  
 81 **uninfected tissues.**

82 **a.** Top differentially expressed genes in clusters shown in Figure 6a. **b.** Dotplot showing  
 83 expression of selected cell markers that were used to annotate clusters in Figure 6a. **c.** T cell  
 84 topics left out from Figure 6d.

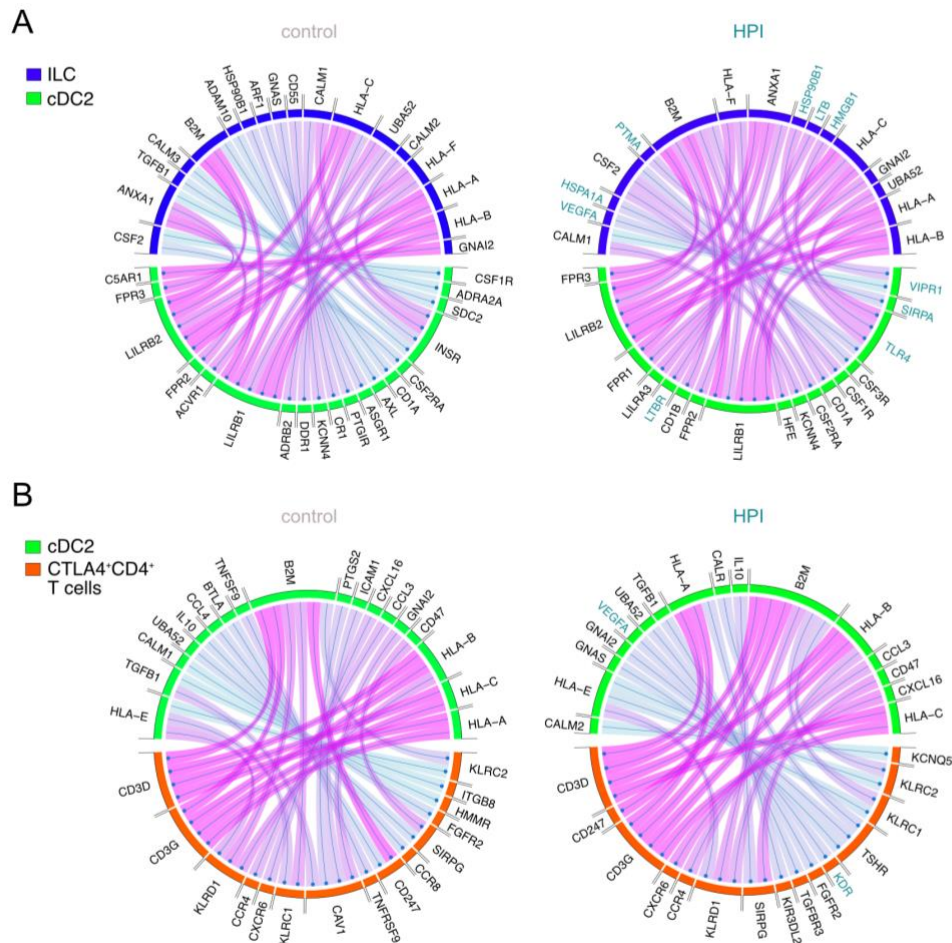

85

86

87 **Suppl. Figure 7 | Innate and adaptive immune cells interact to form gastric TLS in the**  
 88 **HPI tissues**

89 **a.** Chord diagrams showing predicted communication pathways between ILC (ligands) and  
 90 cDC2 (receptors) in HPI and uninfected tissues. **b.** Chord diagrams showing predicted  
 91 communication pathways between cDC2 (ligands) and activated CD4<sup>+</sup> T cells (receptors) in  
 92 HPI and uninfected tissues.

93

94

95

96 **Supplementary Table 1. Clinical characteristics of all patients.**

97

| Patient ID | Age | Height | Weight | Gender | <i>H. pylori</i> infection | Preoperative disease                | Experimental purpose |                     |                   |            |
|------------|-----|--------|--------|--------|----------------------------|-------------------------------------|----------------------|---------------------|-------------------|------------|
|            |     |        |        |        |                            |                                     | FACS                 | Immuno-fluorescence | Microbiome ID     | scRNA seq. |
| 163-11     | 51  | 167    | 121    | Woman  | Positive                   | Hypertension<br>Hypothyreosis       | X                    |                     |                   | X          |
| 163-13     | 25  | 172.5  | 98     | Woman  | Negative                   | None                                | X                    |                     |                   | X          |
| 163-14     | 27  | 176    | 130    | Woman  | Negative                   | Type 2 diabetes                     | X                    |                     |                   |            |
| 163-15     | 38  | 161    | 94     | Woman  | Positive                   | None                                | X                    | X                   |                   | X          |
| 163-16     | 64  | 162    | 90     | Woman  | Negative                   | Hypertension<br>Asthma<br>Allergy   | X                    |                     |                   |            |
| 163-17     | 35  | 161    | 103    | Woman  | Negative                   | Thyroid disease                     |                      | X                   |                   |            |
| 163-22     | 40  | 189    | 150    | Man    | Negative                   | None                                | X                    |                     | Control 1         | X          |
| 163-24     | 34  | 160    | 89     | Woman  | Positive                   | None                                | X                    | X                   | <i>H.pylori</i> 1 |            |
| 163-25     | 32  | 171    | 114    | Woman  | Negative                   | None                                | X                    | X                   | Control 2         | X          |
| 163-30     | 32  | 165    | 104    | Woman  | Negative                   | None                                |                      |                     |                   |            |
| 163-31     | 67  | 150    | 87     | Woman  | Positive                   | Hypertension<br>Atrial fibrillation | X                    | X                   | <i>H.pylori</i> 2 | X          |
| 163-32     | 48  | 173    | 115    | Woman  | Negative                   | None                                |                      | X                   | Control 3         | X          |
| 163-33     | 24  | 164    | 102    | Woman  | Negative                   | Asthma                              |                      |                     |                   | X          |
| 163-35     | 26  | 165    | 129    | Woman  | Negative                   | None                                |                      |                     |                   | X          |

98

99 **Supplementary Table 2. Antibodies used for cell sorting prior to scRNA isolation**

100

| Color                 | Marker              | Clone          | Cat. No. | Company         | Used for   |
|-----------------------|---------------------|----------------|----------|-----------------|------------|
| AlexaFluor 488 / FITC | CD3                 | SK7            | 344804   | BioLegend       | Lineage    |
|                       | TCR $\alpha/\beta$  | IP26           | 306706   | BioLegend       |            |
|                       | TCR $\gamma/\delta$ | B1             | 331208   | BioLegend       |            |
|                       | CD94                | DX22           | 305504   | BioLegend       |            |
|                       | CD34                | 581            | 343504   | BioLegend       |            |
|                       | Fc $\epsilon$ R1a   | AER-37 (CRA-1) | 334608   | BioLegend       |            |
| PE-Cy7                | CD127               | R34.34         | A64618   | Beckman Coulter | CD127      |
| PE-Cy5.5              | HLA-DR              | TU36           | MHLDR18  | Invitrogen      | HLA-DR     |
| APC                   | CD45                | HI30           | 560973   | BD Biosciences  | CD45       |
| DAPI                  | -                   | -              | 564907   | BD Biosciences  | Dead cells |

101

| Hashtag         | Barcode sequence | Company   | Region stained |
|-----------------|------------------|-----------|----------------|
| TotalSeq™-B0251 | GTCAACTCTTTAGCG  | BioLegend | Fundus         |
| TotalSeq™-B0252 | TGATGGCCTATTGGG  | BioLegend | Antrum         |

102

103

104  
105

**Supplementary Table 3. Antibodies used for immunophenotyping of ILCs**

| Color                 | Marker              | Clone          | Cat. No.    | Company         | Used for             |
|-----------------------|---------------------|----------------|-------------|-----------------|----------------------|
| AlexaFluor 488 / FITC | CD3                 | SK7            | 344804      | BioLegend       | Lineage + dead cells |
|                       | CD19                | 4G7            | 345776      | BD Biosciences  |                      |
|                       | CD14                | TÜK4           | F0844       | Dako            |                      |
|                       | CD1a                | HI149          | 300104      | BioLegend       |                      |
|                       | CD123               | 6H6            | 306014      | BioLegend       |                      |
|                       | BDCa2               | AC144          | 130-090-510 | Miltenyi        |                      |
|                       | TCR $\alpha/\beta$  | IP26           | 306706      | BioLegend       |                      |
|                       | TCR $\gamma/\delta$ | B1             | 331208      | BioLegend       |                      |
|                       | CD94                | DX22           | 305504      | BioLegend       |                      |
|                       | CD34                | 581            | 343504      | BioLegend       |                      |
|                       | Fc $\epsilon$ R1a   | AER-37 (CRA-1) | 334608      | BioLegend       |                      |
| Live/Dead             | -                   | L34969         | Invitrogen  |                 |                      |
| PE-Cy7                | CD127               | R34.34         | A64618      | Beckman Coulter | CD127                |
| PE-Cy5.5              | CD117               | 104D2D1        | A66333      | Beckman Coulter | CD117                |
| PE-Cy5                | Nkp44 (CD336)       | Z231           | A66903      | Beckman Coulter | NKp44                |
| PE-CF594              | CRTH2 (CD294)       | BM16           | 563501      | BD Biosciences  | CRTH2                |
| APC                   | NKG2a (CD159a)      | Z199           | A60797      | Beckman Coulter | NKG2A                |
| QD605                 | CD161               | HP-3G10        | 339916      | BioLegend       | CD161                |
| AmCyan                | CD45                | HI30           | 560777      | BD Biosciences  | CD45                 |

106  
107

108 **Supplementary Table 4. Antibodies used for immunofluorescence microscopy**

109

| Reagents                                        | Clone | Cat. No. | Company        |
|-------------------------------------------------|-------|----------|----------------|
| <b>Primary</b>                                  |       |          |                |
| Polyclonal rabbit anti-human CD3                | -     | GA503    | Dako           |
| Biotinylated monoclonal mouse anti-human CD20   | 2H7   | 567709   | BD Biosciences |
| PE-conjugated monoclonal mouse anti-human CD11c | B-ly6 | 555392   | BD Biosciences |
| <b>Secondary</b>                                |       |          |                |
| AF488-conjugated donkey anti-rabbit antibody    | -     | A-21206  | Invitrogen     |
| AF647-conjugated streptavidin                   | -     | 405237   | BioLegend      |

110

111

112 **Supplementary Table 5. (separate excel file). DEG analysis between clusters from**  
 113 **fundus VS antrum of figure 2.**

114
